# Supplementary material for: Arenobufagin Induces Apoptotic Cell Death in Human Non-Small-Cell Lung Cancer Cells via the Noxa-Related Pathway
Source: Molecules. 2017 Sep 11;22(9):1525. doi: 10.3390/molecules22091525 (PMC6151516; doi:10.3390/molecules22091525)
Supplement: Supplementary file 1 [file molecules-22-01525-s001.pdf]

*Article*

# **Arenobufagin Induces Apoptotic Cell Death in Human Non-Small-Cell Lung Cancer Cells via Noxa-related Pathway**

**Liang Ma, Yindi Zhu, Sheng Fang, Hongyan Long, Xiang Liu \* and Zi Liu \***

Department of Chemical Biology and Pharmaceutical Engineering, School of Chemistry and Chemical Engineering, Anhui University of Technology, Ma'anshan, Anhui 243002, China; [alexingma@163.com](mailto:alexingma@163.com) (L.M.); [zhuyindi0805@163.com](mailto:zhuyindi0805@163.com) (Y.Z.); [fngseng12345@163.com](mailto:fngseng12345@163.com) (S.F.); longhongyan1995@163.com (H.L.)

\* Correspondence: liuxiang@ahut.edu.cn (X.L.); tarring126@126.com (Z.L.); Tel.: +86-555-2311-551

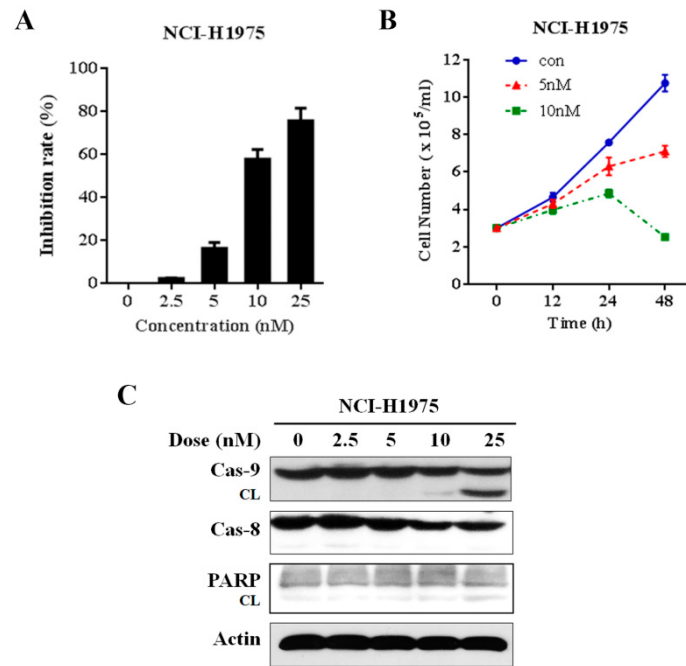

**Figure S1.** Anti-NSCLC activity of arenobufagin on NCI-H1975 cells. **(A)** The inhibitory effects of arenobufagin on NCI-H1975 cells analyzed by 3-(4, 5-dimethylthiazol-2-yl)-2, 5-diphenyltetrazolium bromide (MTT) assay; **(B)** Inhibitory effects of arenobufagin on cell viability of NCI-H1975 cells measured by trypan blue exclusion assay; **(C)** NCI-H1975 cells were treated with indicated doses of arenobufagin, and the activation of Caspase-9 (Cas-9), Caspase-8 (Cas-8), and PARP was measured by western blot analysis.
